# Supplementary material for: Artificial cell membrane binding thrombin constructs drive in situ fibrin hydrogel formation
Source: PubMed Central journal article supplement (PMC6478844; doi:10.1038/s41467-019-09763-0), 2019-04-23
Supplement: 41467_2019_9763_MOESM1_ESM.pdf [file 41467_2019_9763_MOESM1_ESM.pdf]

## **Supplementary Information**

### **Artificial cell membrane binding thrombin constructs drive *in situ* fibrin hydrogel formation**

Deller *et. al.*

## Supplementary Figures

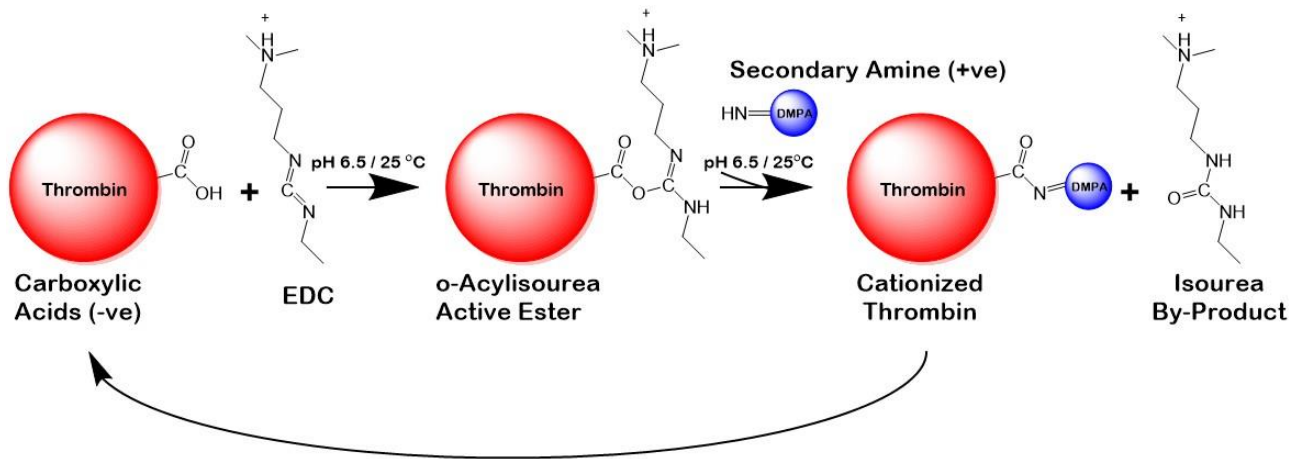

**Supplementary Figure 1** | Schematic of protein cationization via the N-(3-dimethylaminopropyl)-N'-ethylcarbodiimide hydrochloride (EDC) mediated covalent attachment of cationic N,N'-dimethyl-1,3-propanediamine (DMPA) to carboxylic acid functional groups generating a supercationic construct.

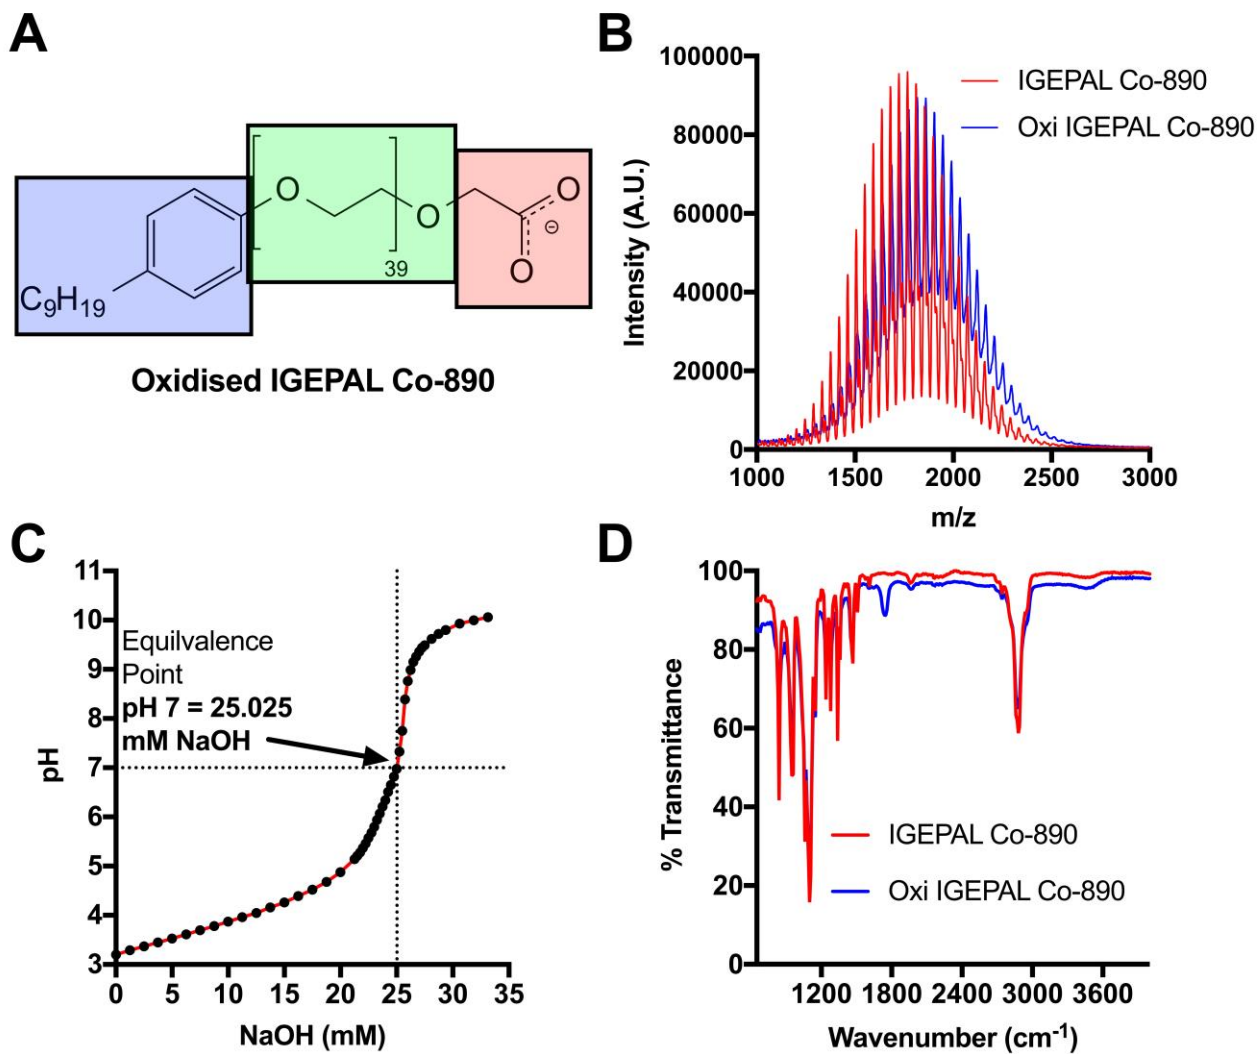

**Supplementary Figure 2 |** Characterisation of oxidised IGEPAL Co-890 surfactant. **A.** Structure of oxidised IGEPAL Co-890, highlighting the modified anionic headgroup (red), poly(ethylene)glycol linker (green) and hydrophobic nonylphenyl membrane binding domain (blue). **B.** MALDI-TOF mass spectroscopy of IGEPAL Co-890 and oxidised IGEPAL Co-890 highlighting an increase in mass and no significant changes in polydispersity. **C.** Acid-Base titration of oxidised IGEPAL Co-890 highlighting near 100% conversion of the terminal hydroxyl group to the desired carboxylic acid. **D.** FT-IR of IGEPAL Co-890 and oxidised IGEPAL Co-890 highlighting the presence of a carbonyl (C=O stretch;  $1740\text{ cm}^{-1}$ ) group indicative of a carboxylic acid.

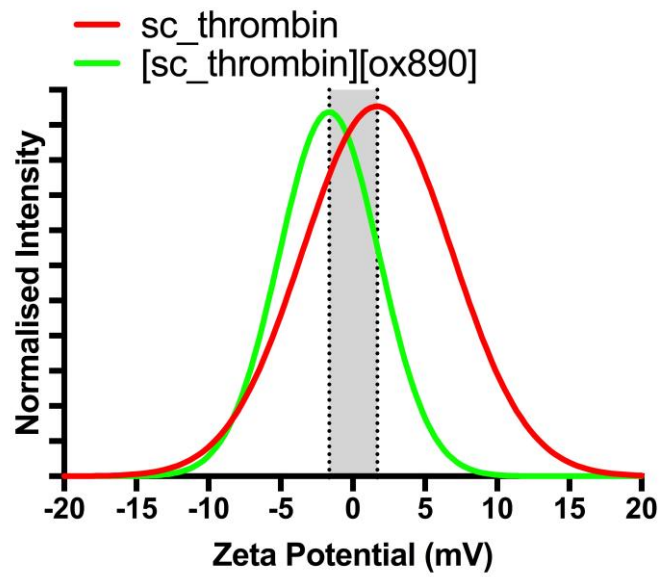

**Supplementary Figure 3** | Zeta Potentiometry distribution of sc\_thrombin (+1.7 mV) and [sc\_thrombin][ox890] (-1.6 mV) at pH7 in 20 mM HEPES. Data shown as normalised Gaussian distributions of raw data.

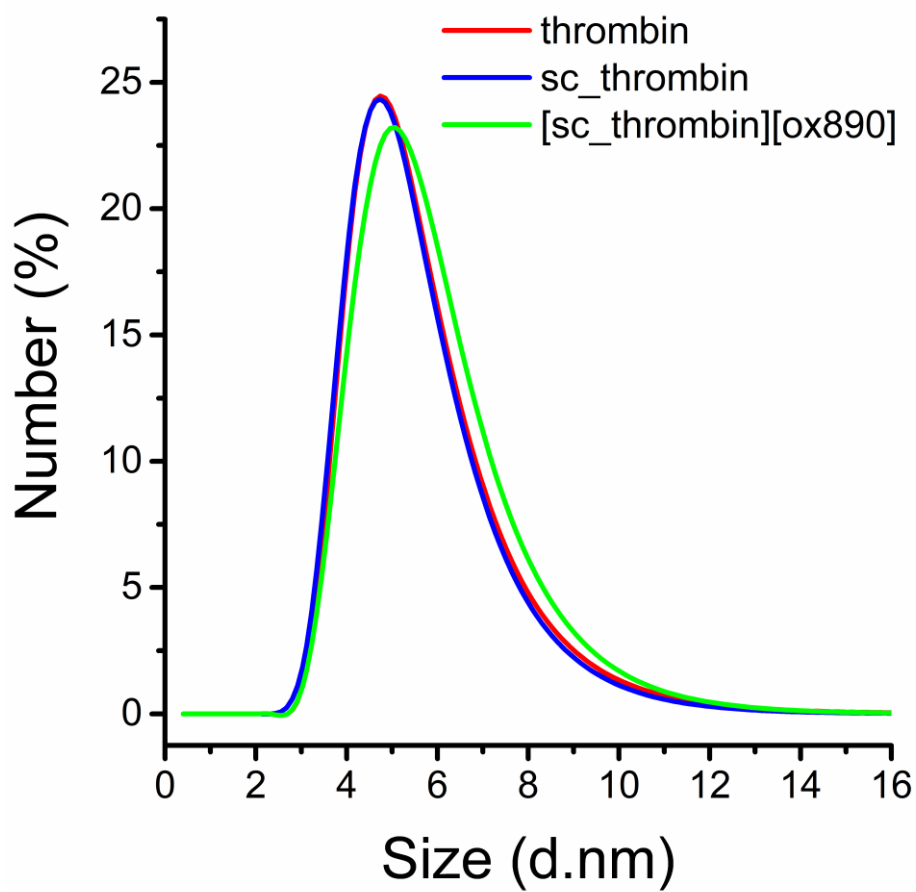

**Supplementary Figure 4** | Dynamic light scattering measurements of thrombin preparations. Native Thrombin (red), sc\_thrombin (blue) and [sc\_thrombin][ox890] (green). All measurements were attained in 20 mM HEPES (pH6.5) at 25 °C. Curves represent % values of number distribution data.

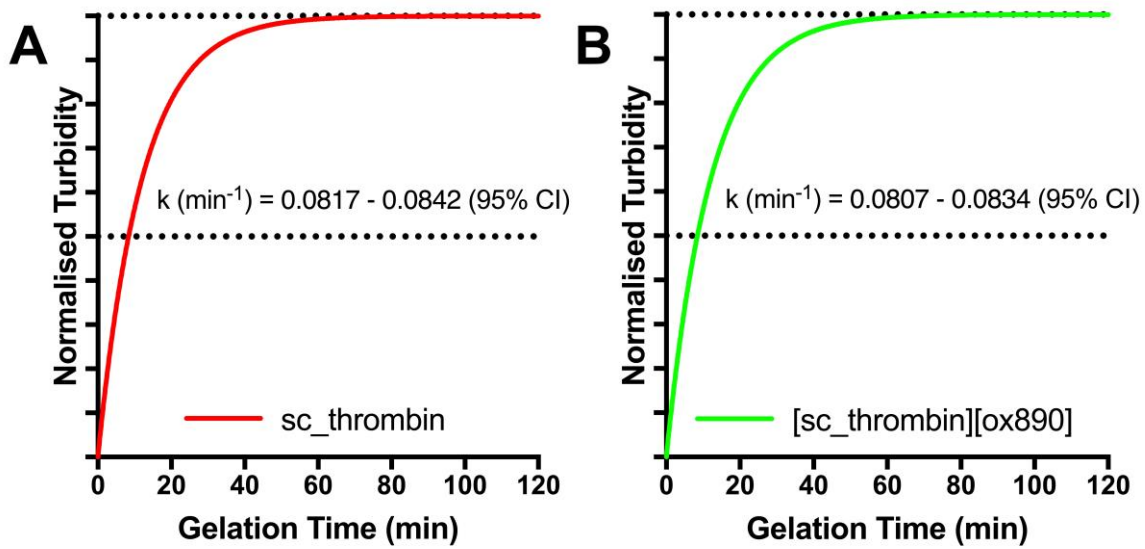

**Supplementary Figure 5** | Rate of fibrin ( $2.5 \text{ mg}\cdot\text{mL}^{-1}$ ) gelation as measured by changes in turbidity (600 nm) catalysed by **A.** sc\_thrombin and **B.** [sc\_thrombin][ox890]. Data shown as one-phase association curves with  $Y=0$  and Plateau =100 of the raw data (>700 data points) with corresponding rate constants ( $k; \text{min}^{-1}$ ) listed with a 95% confidence interval (CI).

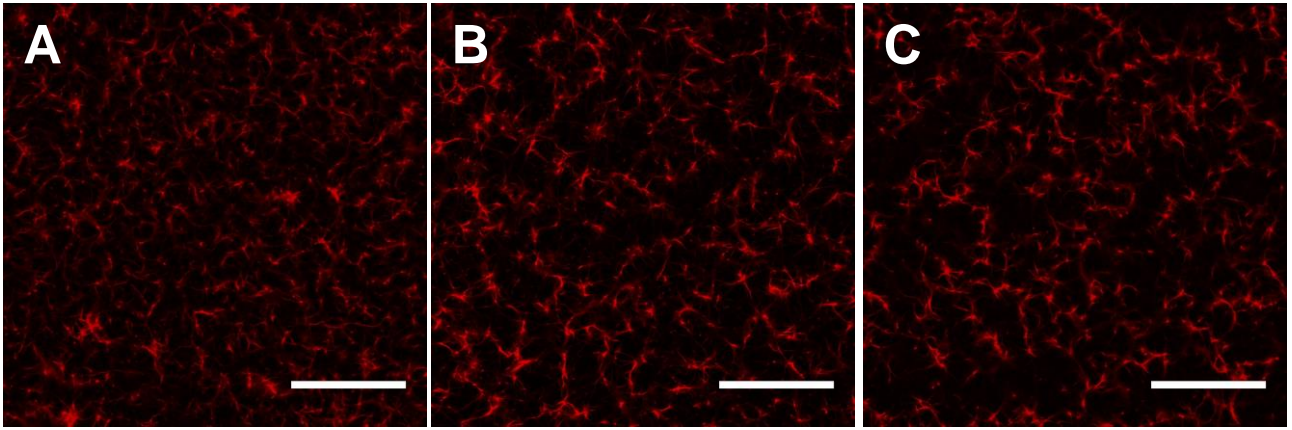

**Supplementary Figure 6** | Confocal fluorescence microscopy of Alexa-594 conjugated (2 wt. %) fibrin ( $\approx 6 \text{ mg.mL}^{-1}$ ) gels 24 hours post formation with ( $\approx 0.9 \mu\text{M}$ ) **A.** Native, **B.** sc\_thrombin and **C.** [sc\_thrombin][ox890]. Scale bars represent  $50 \mu\text{m}$ .

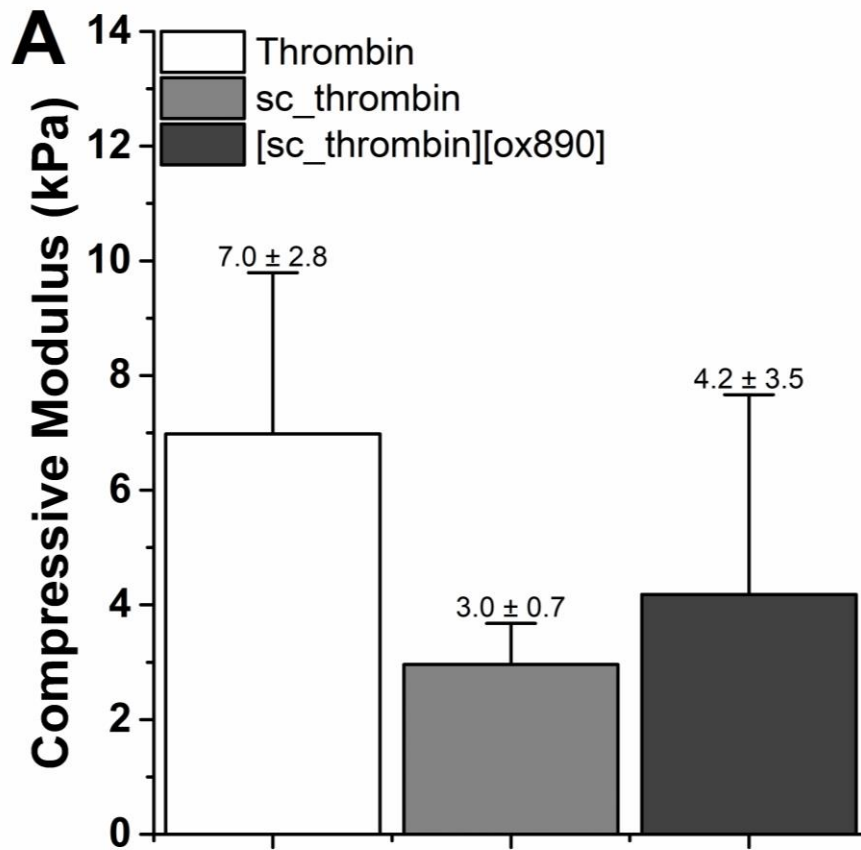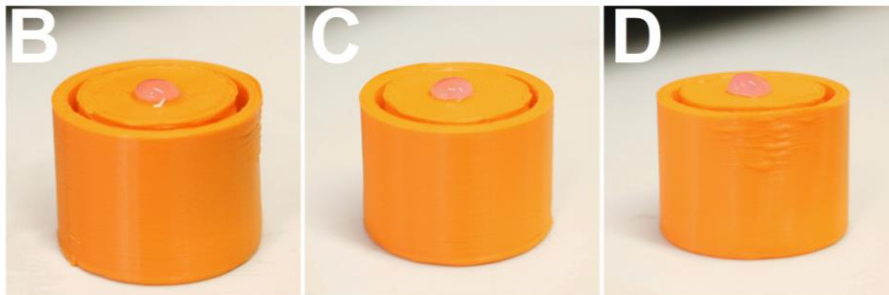

**Supplementary Figure 7 | A.** Compressive modulus ( $n=5$ ) of  $6 \text{ mg/mL}^{-1}$  fibrin gels after 24 hours formed by 200 nM thrombin, sc\_thrombin or [sc\_thrombin][ox890]. Data reported as the means  $\pm$  s.d. No statistically significant differences (Tukey's test). Macroscopic photographs of fibrin gels after 24 hours catalysed by 200 nM **B.** native thrombin, **C.** sc\_thrombin and **D.** [sc\_thrombin][ox890]. Source data are provided as a Source Data file.



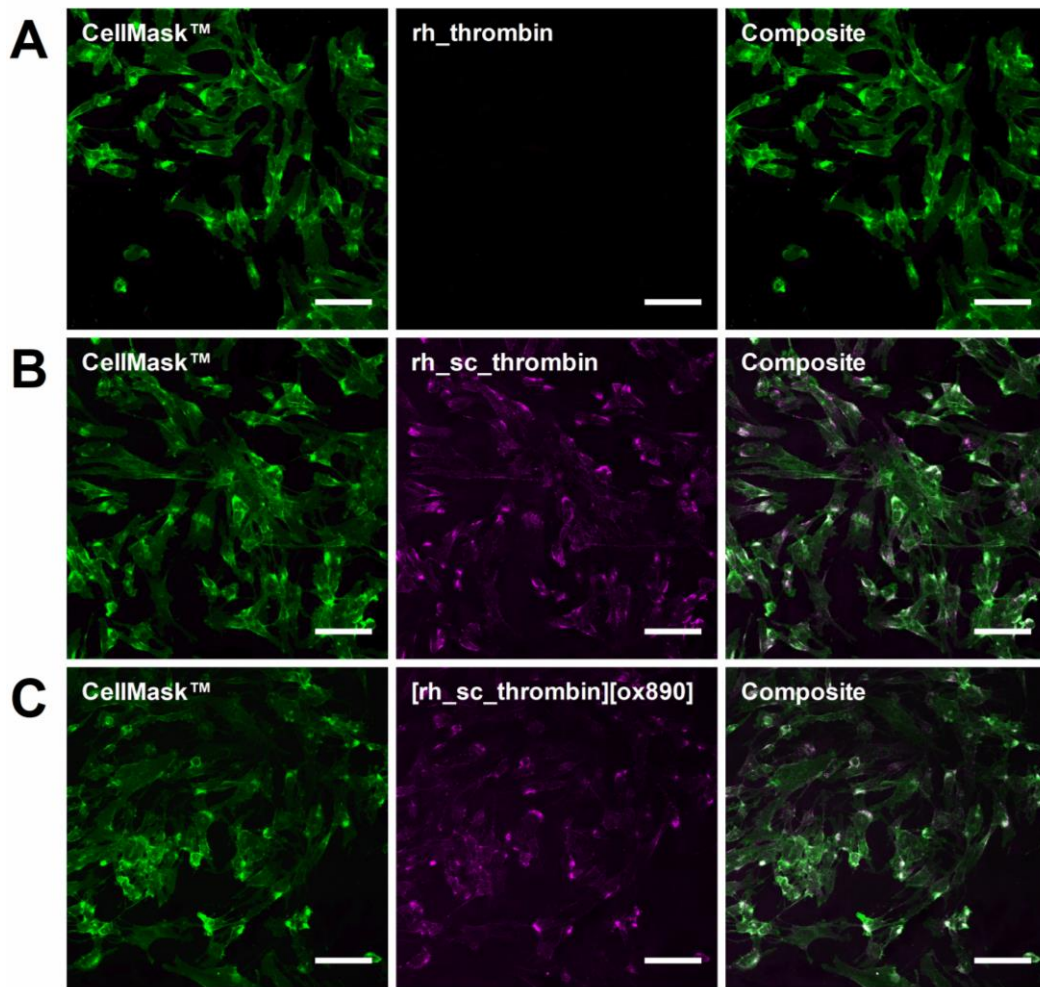

**Supplementary Figure 8** | Additional evaluation of rh\_thrombin, rh\_sc\_thrombin and [rh\_sc\_thrombin][ox890] hMSC plasma membrane affinity at lower magnification. Cells labelled with CellMask™ Deep Red (green) and corresponding rhodamine labelled thrombin (magenta). **A.** Native (rh\_thrombin) thrombin at T= 0 hr. **B.** Cationised (rh\_sc\_thrombin) thrombin at T= 0 hr. **C.** Polymer surfactant conjugate ([rh\_sc\_thrombin][ox890]) thrombin at T= 0 hr. Scale bars represent 100 µm.

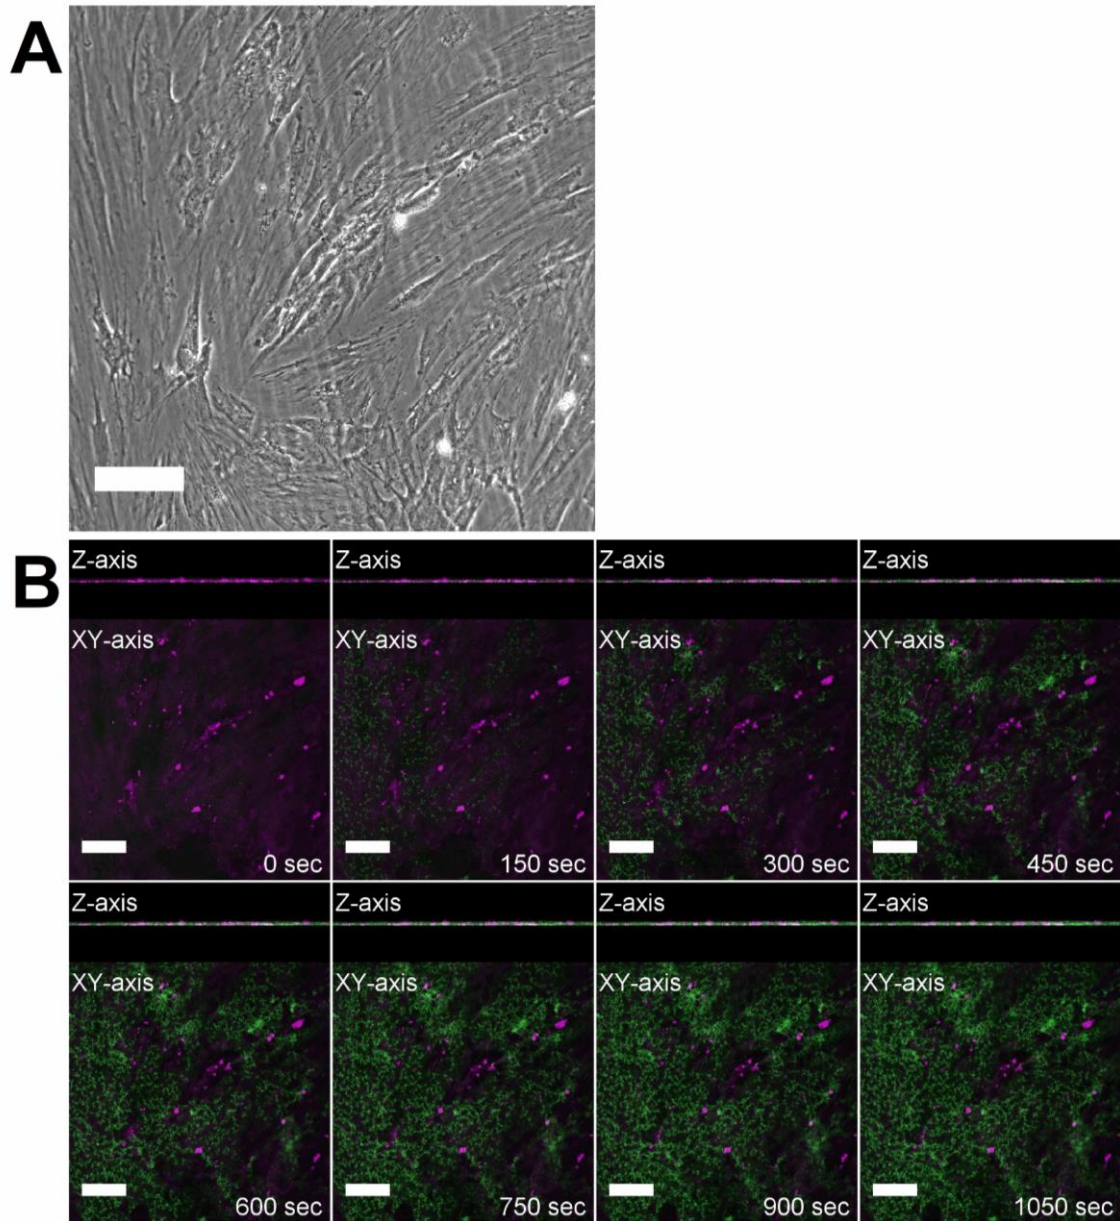

**Supplementary Figure 9** | Fibrin formation from confluent [rh\_sc\_thrombin][ox890] coated hMSCs. **A.** Phase contrast micrograph of hMSCs at t=0 sec highlighting hMSC confluence. **B.** Time course of [rh\_sc\_thrombin][ox890] (magenta) labelled hMSCs supplemented with 10 mg.mL<sup>-1</sup> fibrin gel comprising 1 wt.% Alexa 488 conjugated fibrinogen (green) and imaged immediately thereafter at 150 second intervals for a period of 20 minutes highlighting fibrin formation emanating from the cell surface. Scale bar represents 100  $\mu$ m.

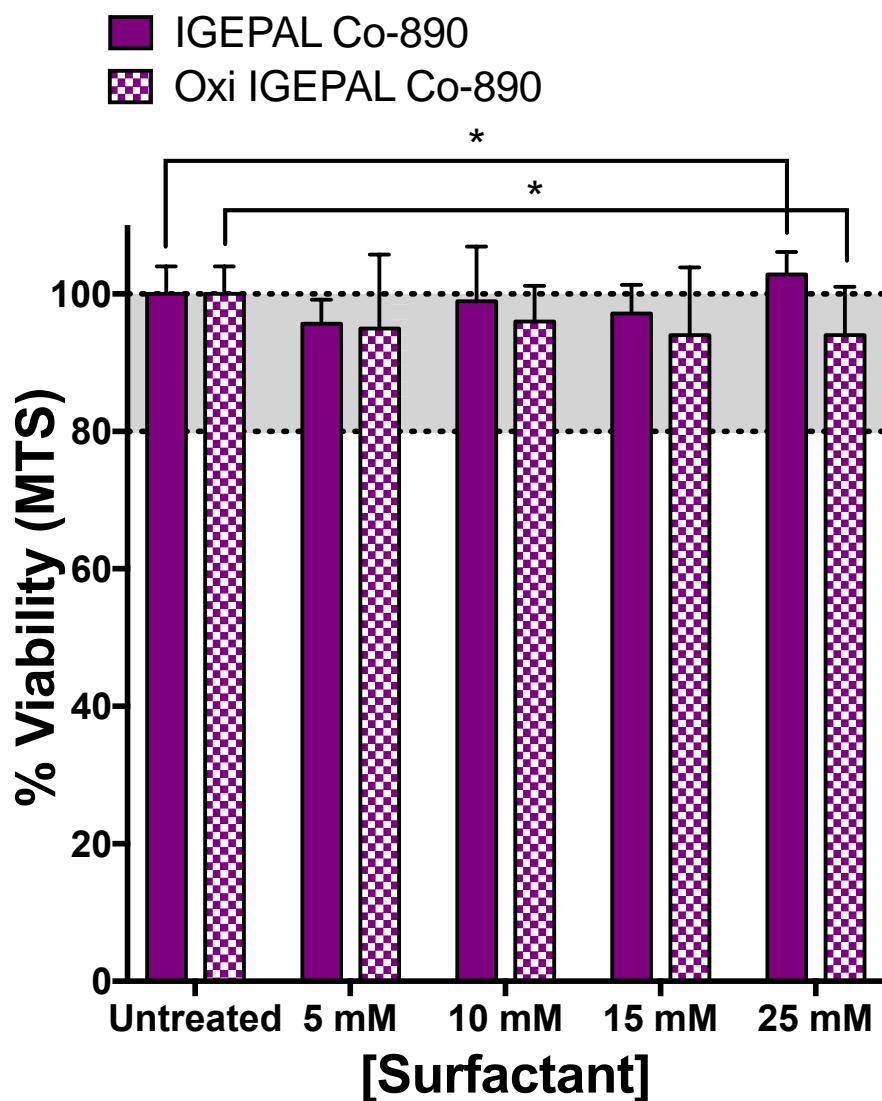

**Supplementary Figure 10** | Cell viability (MTS Assay) of hMSCs exposed to either IGEPAL Co-890 or Oxidised IGEPAL Co-890 surfactant for a period of 20 minutes at 37 °C / 5 % CO<sub>2</sub> in 60mM HEPES solution at pH7. Data reported as means ± s.d. of 4 replicates. No significant difference (\*) between untreated vs. 25 mM IGEPAL Co-890 ( $p = 0.2537$ ) and untreated vs. Oxidised IGEPAL Co-890 ( $p = 0.0958$ ). Two-tailed unpaired t-test. Source data are provided as a Source Data file.

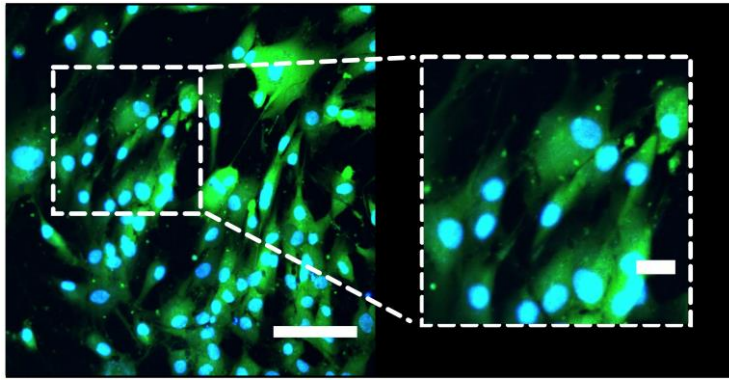

**Supplementary Figure 11** | Evaluation of cellular fibrin hydrogel formation in non [sc\_thrombin][ox890] modified hMSCs. Live-cell confocal fluorescence micrograph (2D) showing no spontaneous Alexa-594-labelled fibrin formation after 60 minutes in the absence of supplemented FBS. hMSCs stained with Calcein AM (green) and Hoechst 33342 (blue) with scale bar representing 100  $\mu\text{m}$ . Insert represents cells at higher magnification with scale bar representing 25  $\mu\text{m}$ .

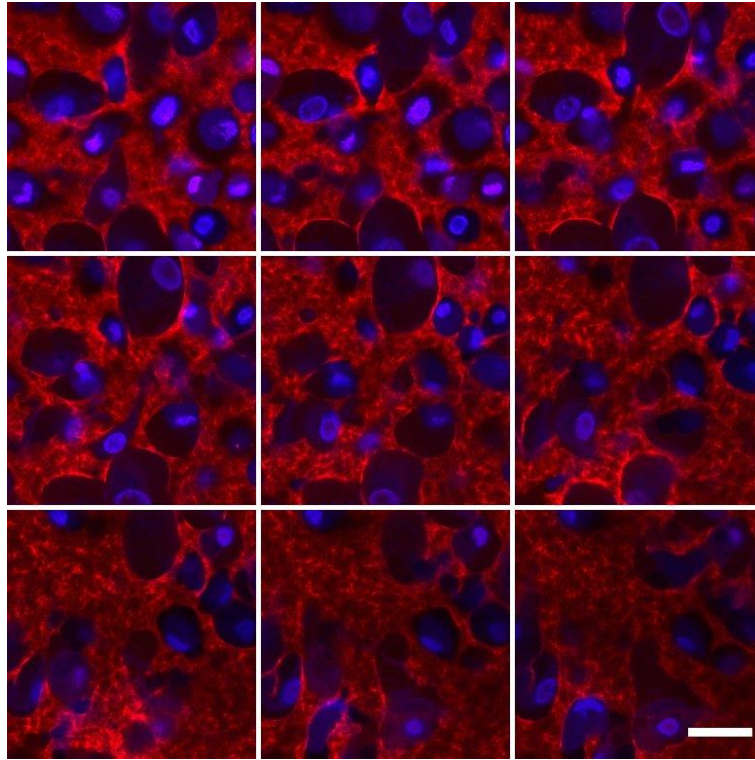

**Supplementary Figure 12** | Confocal Microscopy highlighting the uniform distribution of hMSCs within an Alexa Fluor® 594 labelled fibrin gel (red) construct generated from [sc\_thrombin][ox890] coated hMSCs. Cells stained with Hoechst 33342 (blue). Panels represent a Z-stack at 5 µm intervals from left to right, top to bottom. Scale bar represents 50 µm.



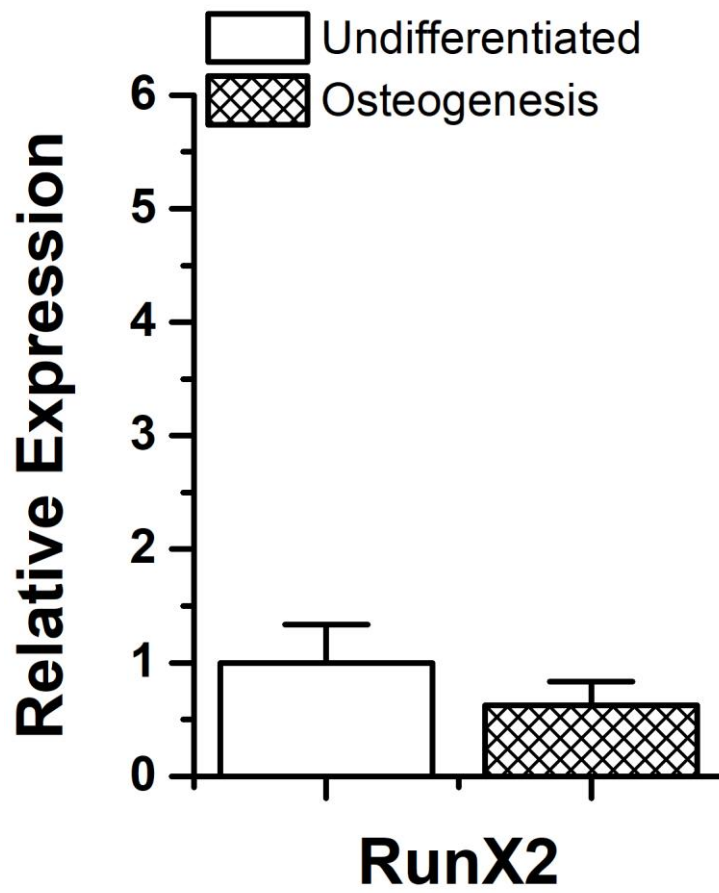

**Supplementary Figure 13** | Relative expression ( $n \geq 9$ ) of RUNX2 in [sc\_thrombin][ox890] coated hMSCs within catalysed fibrin, cultured in multipotent or osteogenic medium for 7 days. Data reported as means  $\pm$  s.e.m. No Significant Difference. One-tailed paired t-test;  $p \leq 0.05$ . Source data are provided as a Source Data file.

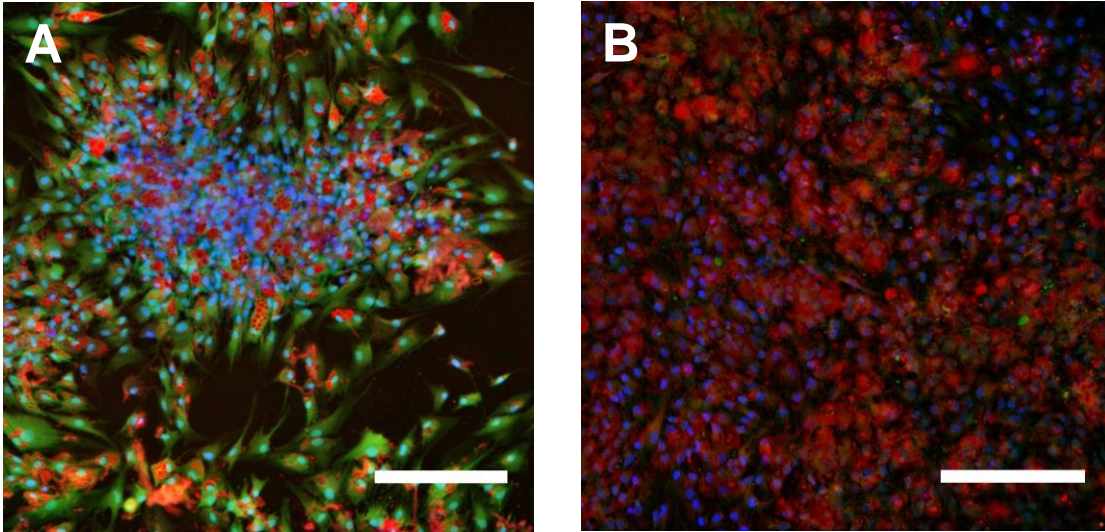

**Supplementary Figure 14** | Widefield fluorescence microscopy of cells liberated (trypsin) from 3D constructs and replated as a 2D monolayer after differentiation for 21 days in adipogenic (A.) and osteogenic (B.) media. Fibrin constructs were formed initially by [sc\_thrombin][ox890] labelled hMSCs prior to differentiation and liberation. All cells are stained with Calcein AM (green) and Hoechst 33342 (blue). Adipocytes additionally stained with oil red o (red) and osteocytes additionally stained with alizarin red (red). Scale bars represent 250  $\mu\text{m}$ .

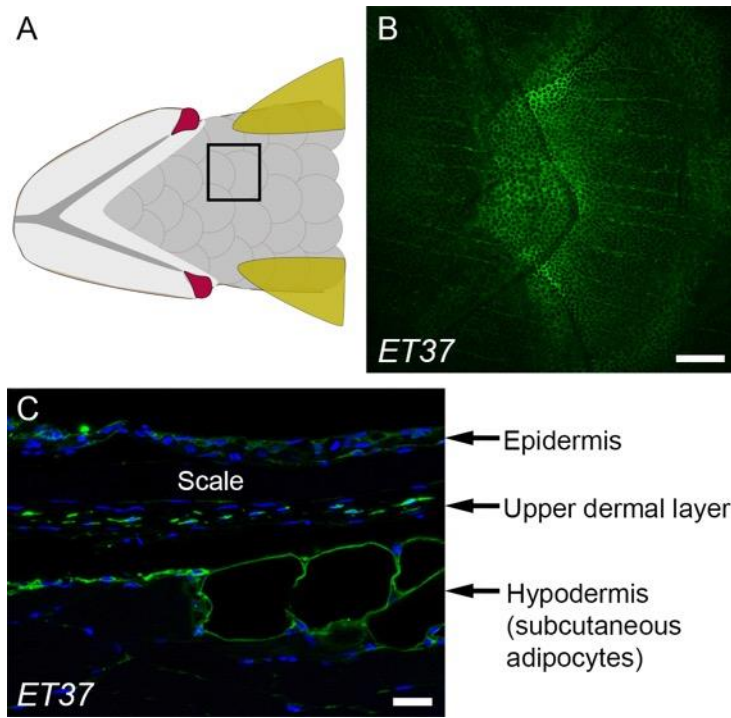

**Supplementary Figure 15 | A.** Schematic diagram showing the arrangement of scales on the upper ventral surface of an adult zebrafish. The boxed region indicates the approximate area shown in **B**. Confocal image of the upper ventral surface of an unwounded *ET37* transgenic zebrafish. GFP+ cells can be seen in the skin. **C.** Section through the skin of an adult *ET37* transgenic zebrafish. The majority of GFP+ cells are in the upper dermal layer and surrounding the adipocytes of the hypodermis. Scale bars: B = 200  $\mu$ m; C = 20  $\mu$ m.



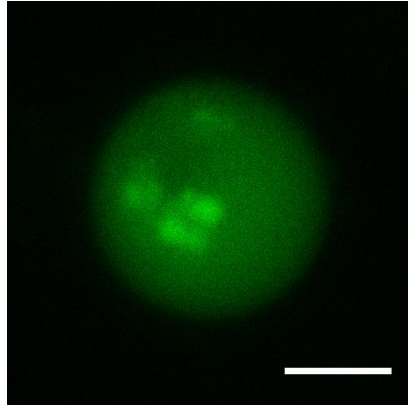

**Supplementary Figure 16** | Confocal fluorescence micrograph (Z-projection) of an individual GFP expressing fibroblast from *Danio rerio* (ET37) isolated by FACS, highlighting systemic GFP expression. Scale bar represents 5  $\mu\text{m}$ .

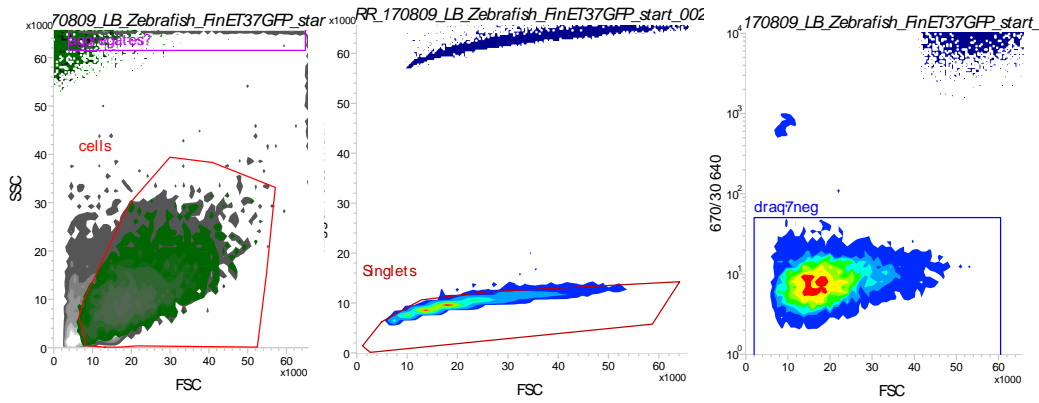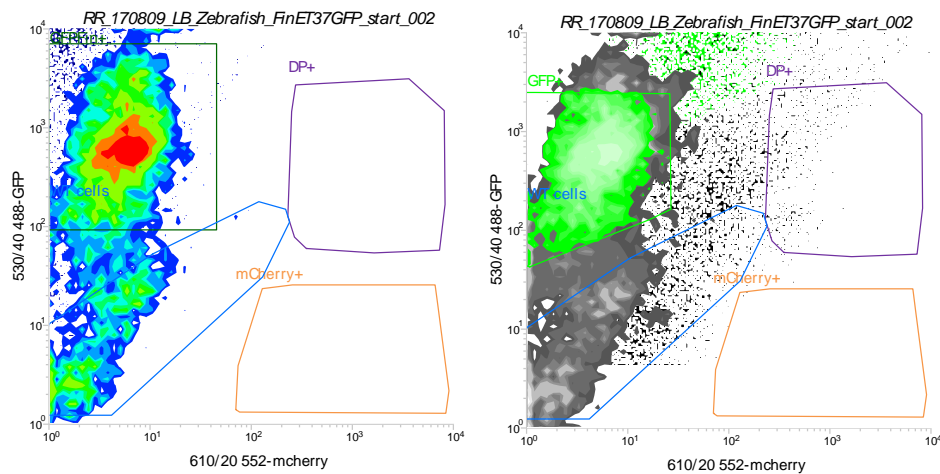

Statistics: RR\_170809\_LB\_Zebrafish\_FinET37GFP\_start\_002

| Populations     | Events | % Total | % Parent | FSC RCV | 530/40 488... RCV | 582/29 552 RCV | 670/30 640 RCV | 460/50 405 RCV |
|-----------------|--------|---------|----------|---------|-------------------|----------------|----------------|----------------|
| All Events      | 13,449 | 100.00% | ####     | 63.22   | 144.86            | 90.29          | 65.31          | 90.04          |
| cells           | 10,000 | 74.35%  | 74.35%   | 45.51   | 138.42            | 76.23          | 56.15          | 70.72          |
| Singlets        | 8,749  | 65.05%  | 87.49%   | 42.06   | 140.89            | 74.91          | 53.14          | 70.42          |
| draq7neg        | 8,374  | 62.26%  | 95.71%   | 41.25   | 139.78            | 74.91          | 48.60          | 70.45          |
| DP+             | 0      | 0.00%   | 0.00%    | ####    | ####              | ####           | ####           | ####           |
| mCherry+        | 0      | 0.00%   | 0.00%    | ####    | ####              | ####           | ####           | ####           |
| GFP+            | 5,027  | 37.38%  | 60.03%   | 43.57   | 82.78             | 62.48          | 46.85          | 54.83          |
| GFPIn+          | 5,547  | 41.24%  | 66.24%   | 40.20   | 87.23             | 61.91          | 46.85          | 52.72          |
| WT cells        | 1,936  | 14.40%  | 23.12%   | 32.09   | 104.61            | 91.58          | 51.61          | 88.21          |
| aggregates?     | 389    | 2.89%   | 2.89%    | 71.31   | 138.91            | 94.78          | 66.77          | 105.02         |
| smaller scatter | 2,955  | 21.97%  | 21.97%   | 35.25   | 145.16            | 81.35          | 46.14          | 83.03          |
| lowscatter      | 2,012  | 14.96%  | 14.96%   | 28.37   | 135.13            | 54.45          | 43.88          | 43.41          |

**Supplementary Figure 17 |** Isolation of GFP expressing fibroblast cells from *Danio rerio* using FACS, highlighting gating criteria and isolation yields. Example plots represent heatmaps with isolation yields based on a sample of at least  $1 \times 10^3$  cells.

## **Supplementary Methods**

### **Acid-Base Titration of Oxidised IGEPAL Co-890**

A standard acid-base titration with 10 mL of 2.503 mM (5 mg.mL<sup>-1</sup>) Oxidised IGEPAL Co-890 against 2.5 mM NaOH was performed with concurrent pH values measured to identify the equivalence point as the quantity of NaOH required to attain pH 7. A total of 25.025 mmol of NaOH was required to neutralise 25.03 mmol of Oxidised IGEPAL Co-890 highlighting complete and successful oxidation.

### **Fourier Transform Infra-Red Spectroscopy**

Fourier Transform Infra-Red (FTIR) spectroscopy was performed on a Spectrum One FTIR spectrometer (Perkin Elmer Inc., MA, U.S.A). Small quantities of solid IGEPAL Co-890 and oxidized IGEPAL Co-890 were separately placed over the quartz window and the sample tightened to ensure accurate measurement. A total of 8 replicates were performed and the averages were reported. The appearance of a carbonyl stretching vibration at 1740 cm<sup>-1</sup> was indicative of successful oxidation and presence of a carboxylic acid functional group

### **Dynamic Light Scattering**

Dynamic light scattering was performed using on a Zetasizer Nano ZSP (Malvern Instruments Ltd, UK). Measurements were conducted at pH 6.5 and a temperature of 25 °C with a minimum of 300 seconds equilibration time in 20 mM HEPES. The values reported show the number (%) distribution of each individual sample.

### **IGEPAL Co890 & Oxidised IGEPAL Co890 Cytotoxicity**

Sterile stock solutions of 5 mg.mL<sup>-1</sup> IGEPAL Co-890 and oxidised IGEPAL Co-890 in 60 mM HEPES pH7 were prepared and diluted in 60 mM HEPES pH7 buffer. To start, complete medium was aspirated from confluent low passage (>5) hMSCs in a 96 well plate (1x10<sup>4</sup> cells/well) and cells then rinsed with 100 µL of PBS prior to the addition of 100 µL of the appropriate solution (0-5 mg.mL<sup>-1</sup>) was added in quadruplicate to cells and incubated for a period of 30 minutes at 37 °C. After 30 minutes cells were rinsed twice with 100 µL PBS prior to assessment of cell viability by the MTS cell viability assay.

### **Alexa Fluor® 594 Fibrin Gel Imaging**

A 6 mg.mL<sup>-1</sup> solution of human fibrinogen constituting 2 wt. % Alexa Fluor® 594 conjugated human fibrinogen was made in complete medium minus FBS with single 100 µL aliquots placed within a 96-well plate. Fibrin formation was catalysed by the addition 10 µL of 0.9 µM thrombin (native, sc\_thrombin or [sc\_thrombin][ox890]) and samples incubated overnight at 37 °C on a lateral rotator (50 rpm) permitting mixing prior to onset of gelation. Confocal fluorescence micrographs were then collected (Excitation 594 nm; Emission 610 nm - 650 nm) the following day highlighting relative fibrin formation.

## Data Analysis

Data interpretation, modelling, numerical analysis and statistical analysis were performed using Microsoft Excel for Mac 2011 (Microsoft Corporation, WA, U.S.A.) and Prism 7 for Mac OS X (Graph Pad Inc., CA, U.S.A.). Determination of sc\_thrombin and [sc\_thrombin][ox890] rate constants ( $k$ ;  $\text{min}^{-1}$ ) utilised a one-phase association model with  $Y=0$  and Plateau =100 of the raw data (>800 data points). Statistical tests and confidence intervals detailing significant differences are as described in the figure legends of the appropriate figure.
